# Supplementary material for: Bandgap-tuned barium bismuth niobate double perovskite for self-powered photodetectors with a full-spectrum response
Source: Royal Society of Chemistry journal article supplement (doi:10.1039/d2tc04310f), 2022-11-25
Supplement: d2tc04310f1.pdf [file d2tc04310f1.pdf]

## Supporting Information for

# Bandgap-Tuned Barium Bismuth Niobate Double Perovskite for Self-Powered Photodetector with Full-Spectrum Response

Zhao Yang Dai<sup>ab</sup>, Chen Chen<sup>c</sup>, Gen Shui Wang<sup>b</sup>, Yi Nong Lyu<sup>\*a</sup> and Nan Ma<sup>\*b</sup>

*<sup>a</sup> College of Materials Science and Engineering, Nanjing Tech University, Nanjing, 210009, China.*

*E-mail: yinonglu@njtech.edu.cn*

*<sup>b</sup> CAS Key Laboratory of Inorganic Functional Materials and Devices, Shanghai Institute of Ceramics, Chinese Academy of Sciences, Shanghai, 201899, China. E-mail: manan@mail.sic.ac.cn*

*<sup>c</sup> State Key Laboratory of High Performance Ceramics and Superfine Microstructure, Shanghai Institute of Ceramics, Chinese Academy of Sciences, Shanghai, 201899, China*

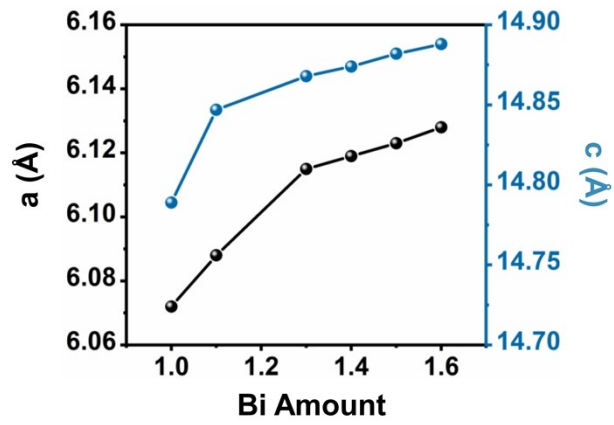

Fig. S1 Lattice constants change with Bi:Nb ratio.

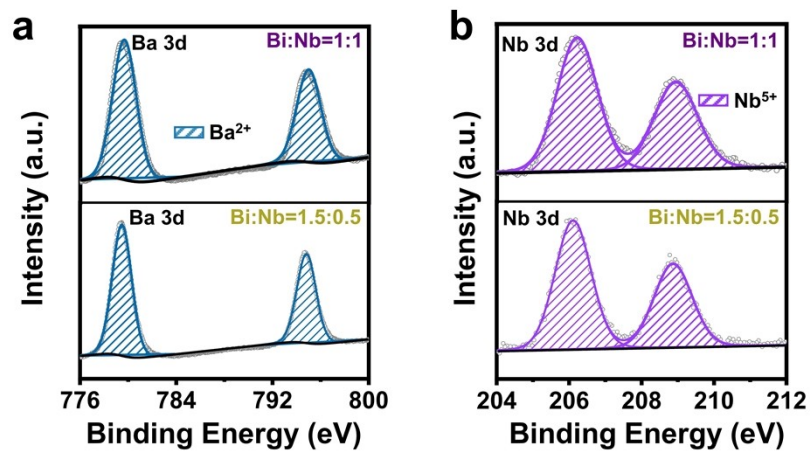

**Fig. S2** XPS spectra of Ba 3d (a) and Nb 3d (b) for  $\text{Ba}_2\text{BiNbO}_6$  and  $\text{Ba}_2\text{Bi}_{1.5}\text{Nb}_{0.5}\text{O}_6$ .

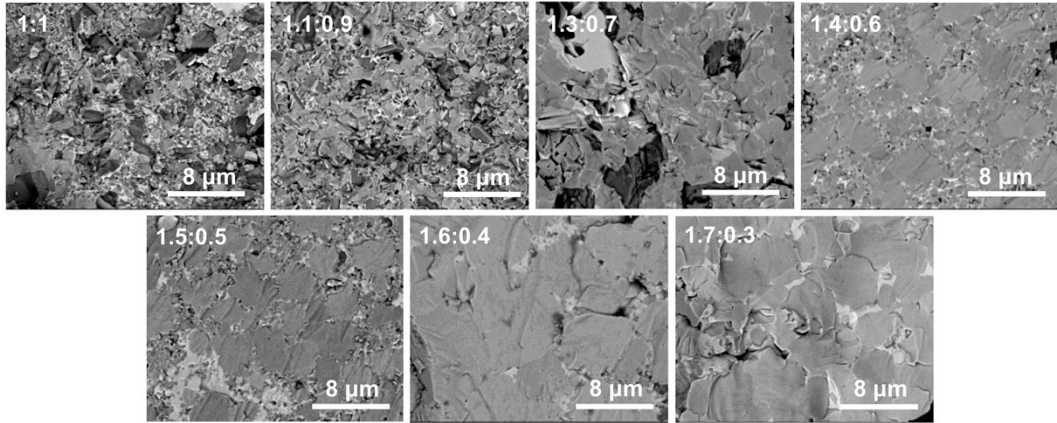

**Fig. S3** SEM images of BBNO ceramics with different Bi:Nb ratios.

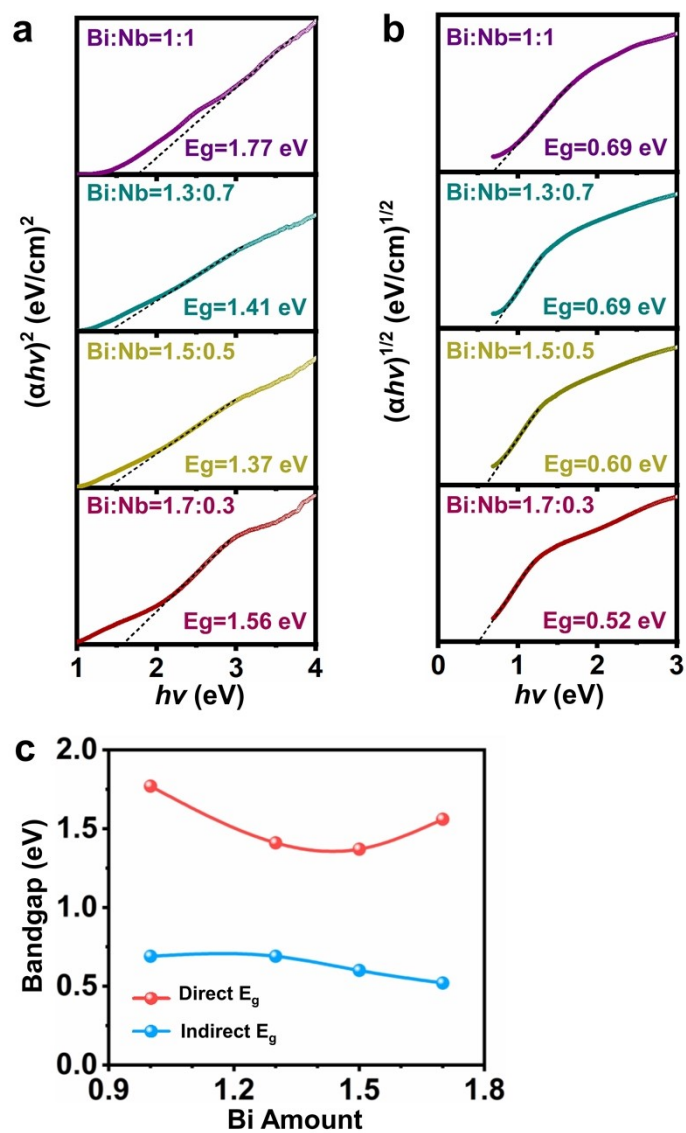

**Fig. S4**  $(\alpha hv)^2$  plot (a),  $(\alpha hv)^{1/2}$  plot (b) and bandgap change (c) of BBNO with different Bi:Nb ratios.

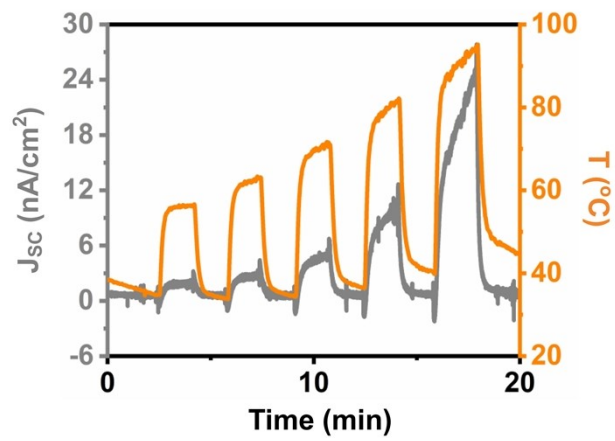

**Fig. S5** Output current of ITO/BBNO/Ag (Bi:Nb=1.5:0.5) under periodically heating.

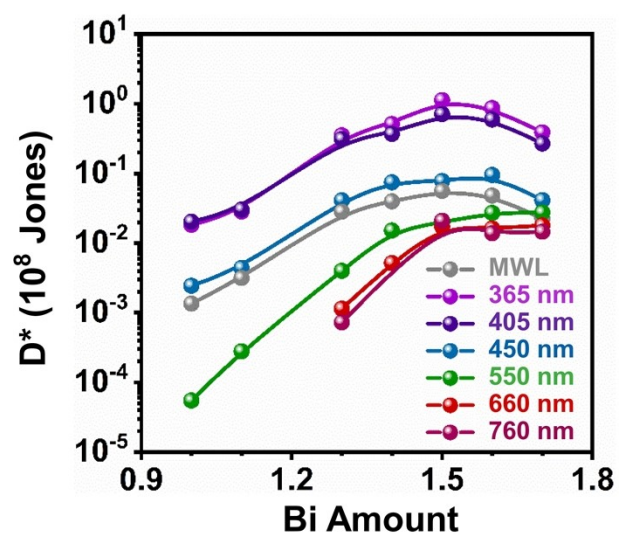

**Fig. S6** Bi:Nb ratio-dependent specific detectivity  $D^*$  of ITO/BBNO/Ag devices under different wavelengths.

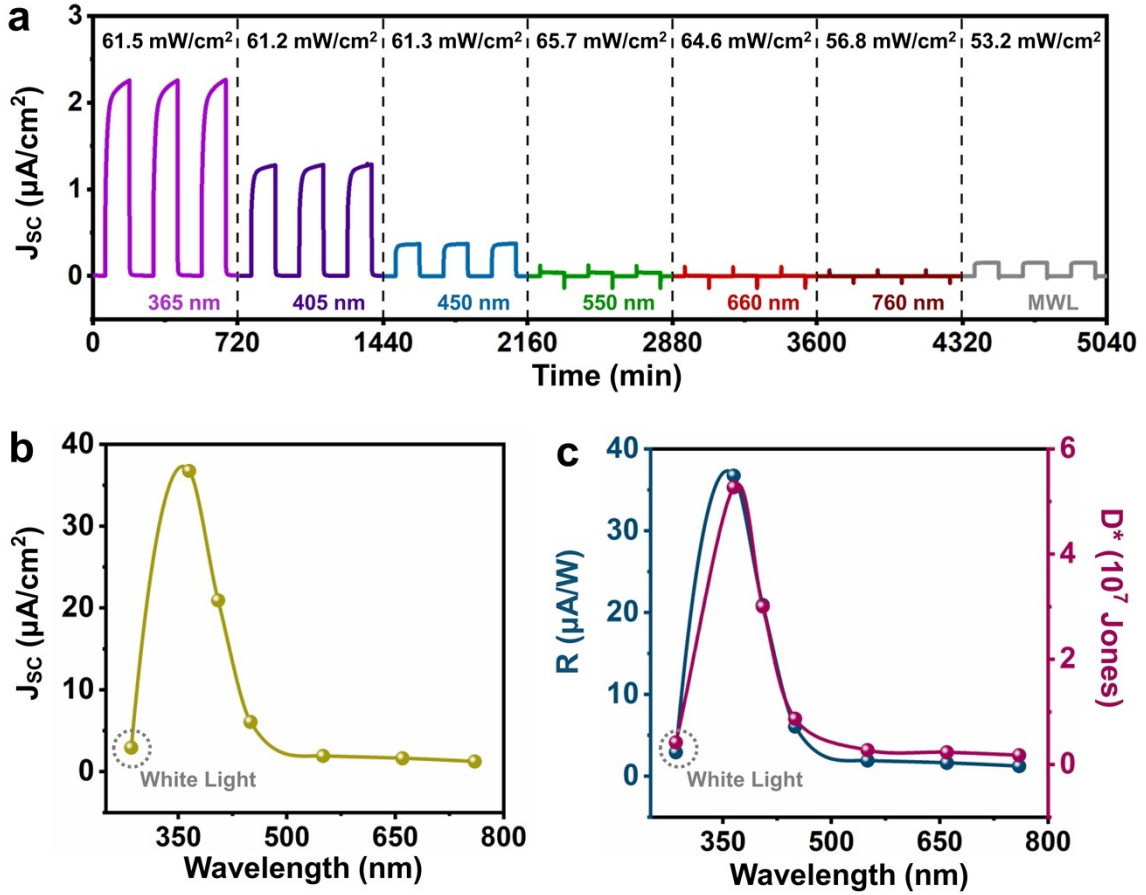

**Fig. S7** Wavelength-dependent photoresponse of  $\text{Ba}_2\text{Bi}_{1.5}\text{Nb}_{0.5}\text{O}_6$  to different wavelengths of light. (a)  $J_{sc}$ - $t$  curves under 365-760 nm and white light. (b) Wavelength-dependent photocurrent density  $J_{sc}$ , responsivity  $R$ , and specific detectivity  $D^*$ .



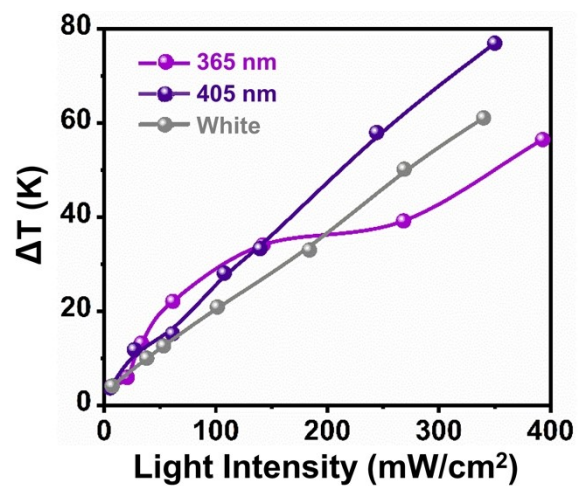

**Fig. S8** Surface temperature change as illuminated by different intensities of 365, 405 nm, and white light.

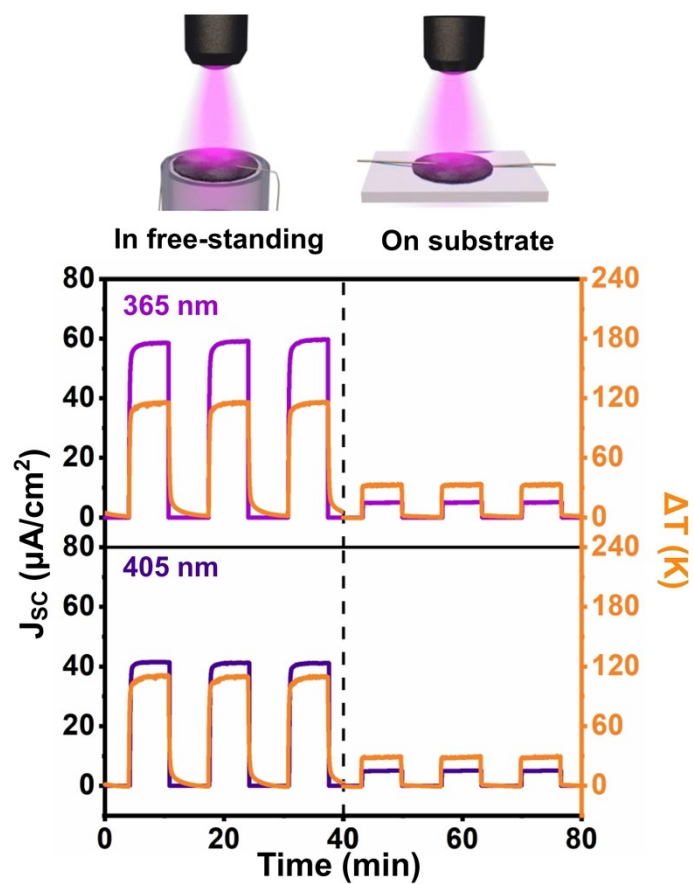

**Fig. S9** Photocurrent and surface temperature rise under 365 and 405 nm illumination when the ITO/BBNO/Ag photodetector in free-standing and on substrate state.

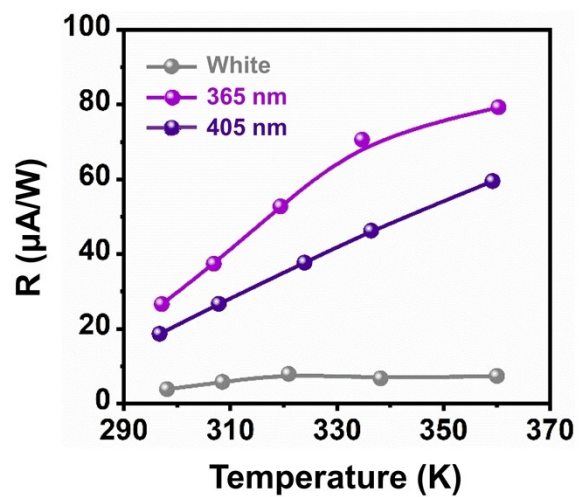

**Fig. S10** Temperature-dependent responsivity to white, 365, and 405 nm light.

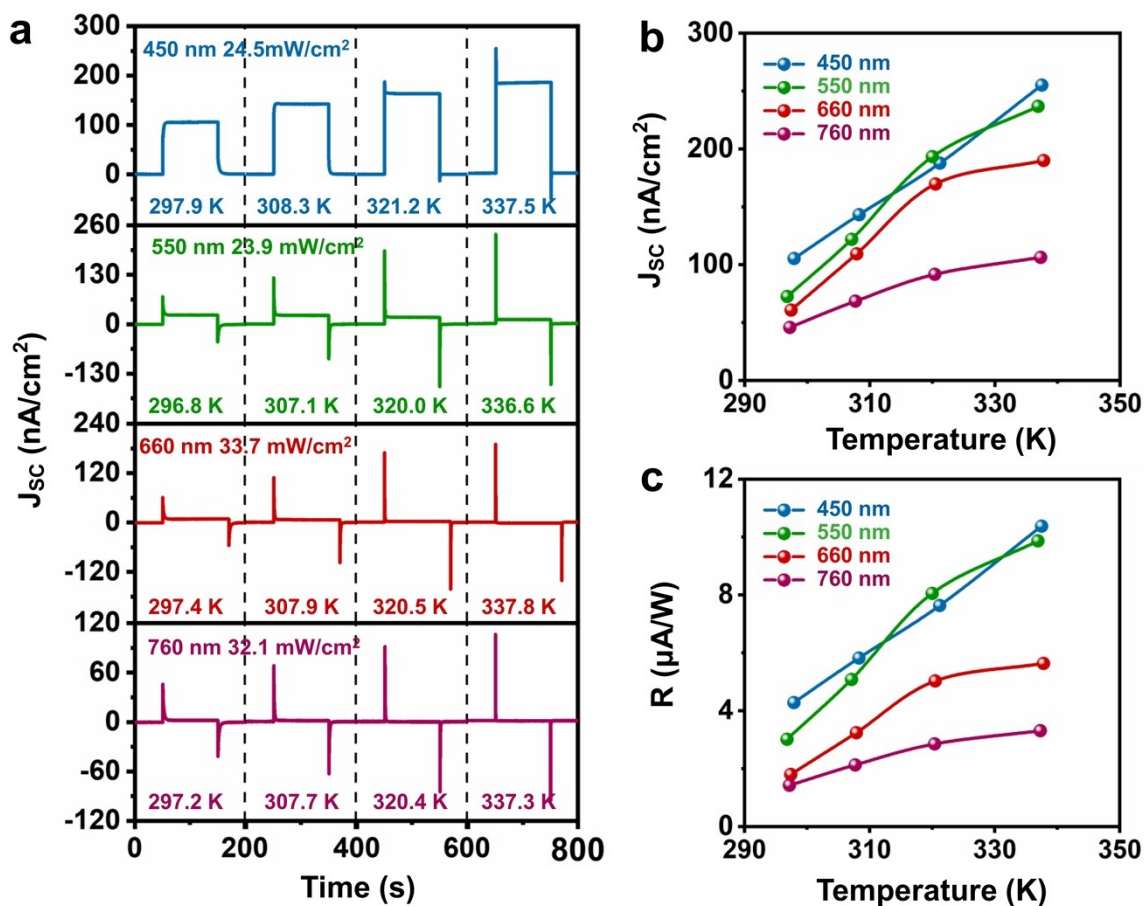

**Fig. S11** Temperature-dependent photoresponse to 450, 550, 660 and 760 nm light. (a)  $J_{sc}$ - $t$  curves at different temperatures. (b,c) Peak photocurrent density  $J_{sc}$  and responsivity  $R$  change with temperature.

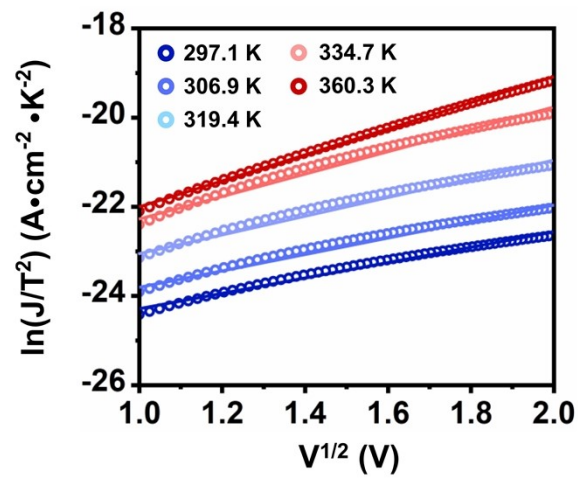

**Fig. S12**  $\ln(J/T^2)$  versus  $V^{0.5}$  curves under positive bias voltage.

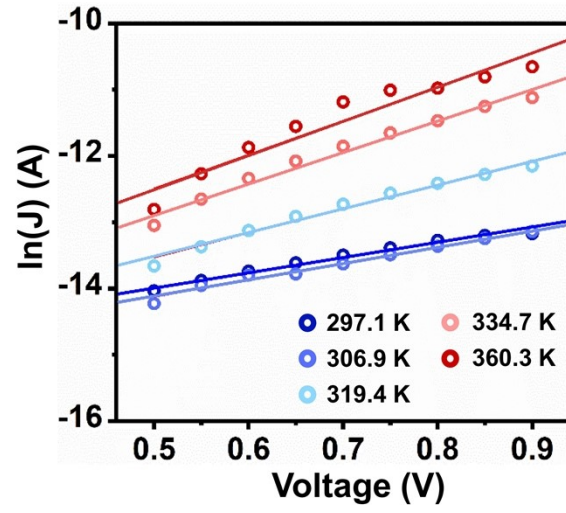

Fig. S13  $\ln(J)$  versus  $V$  under positive bias voltage.

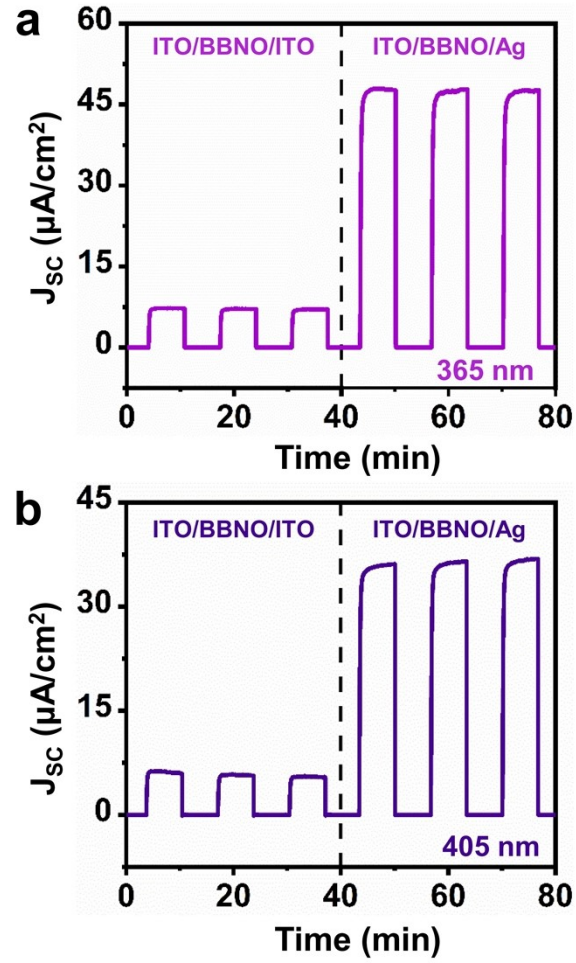

**Fig. S14** Effect of bottom electrode on the photocurrent for BBNO-based photodetectors under 365 nm ( $661 \text{ mW}/\text{cm}^2$ ) and 405 nm ( $742 \text{ mW}/\text{cm}^2$ ) light.

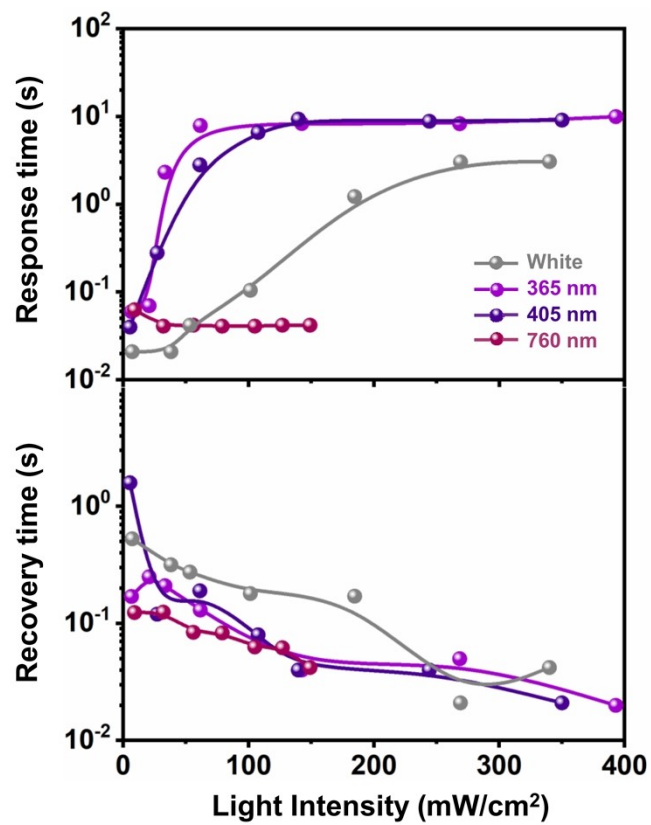

**Figure. S15** Response and recovery time change with the increasing intensity of white, 365, 405, and 760 nm light.



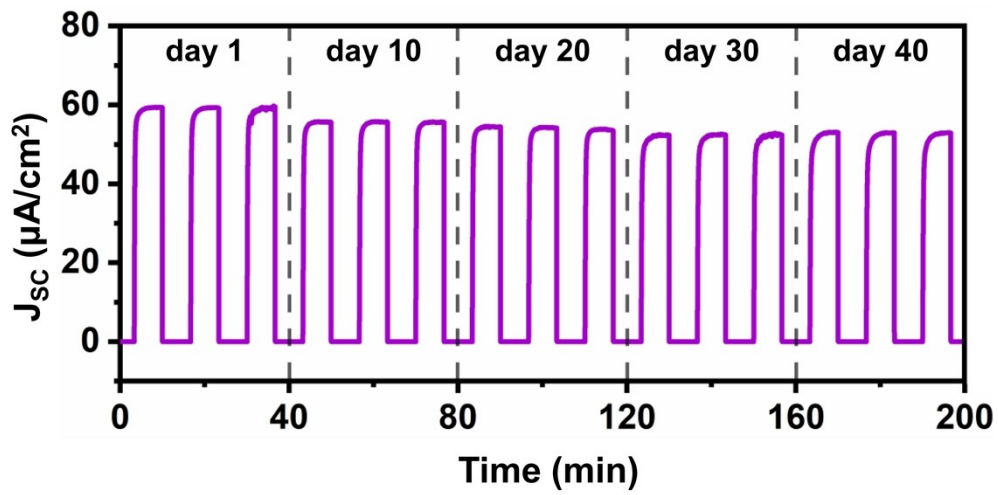

**Fig. S16** Long-time stability of ITO/BBNO/Ag photodetector under 365 nm light ( $661 \text{ mW}/\text{cm}^2$ ).

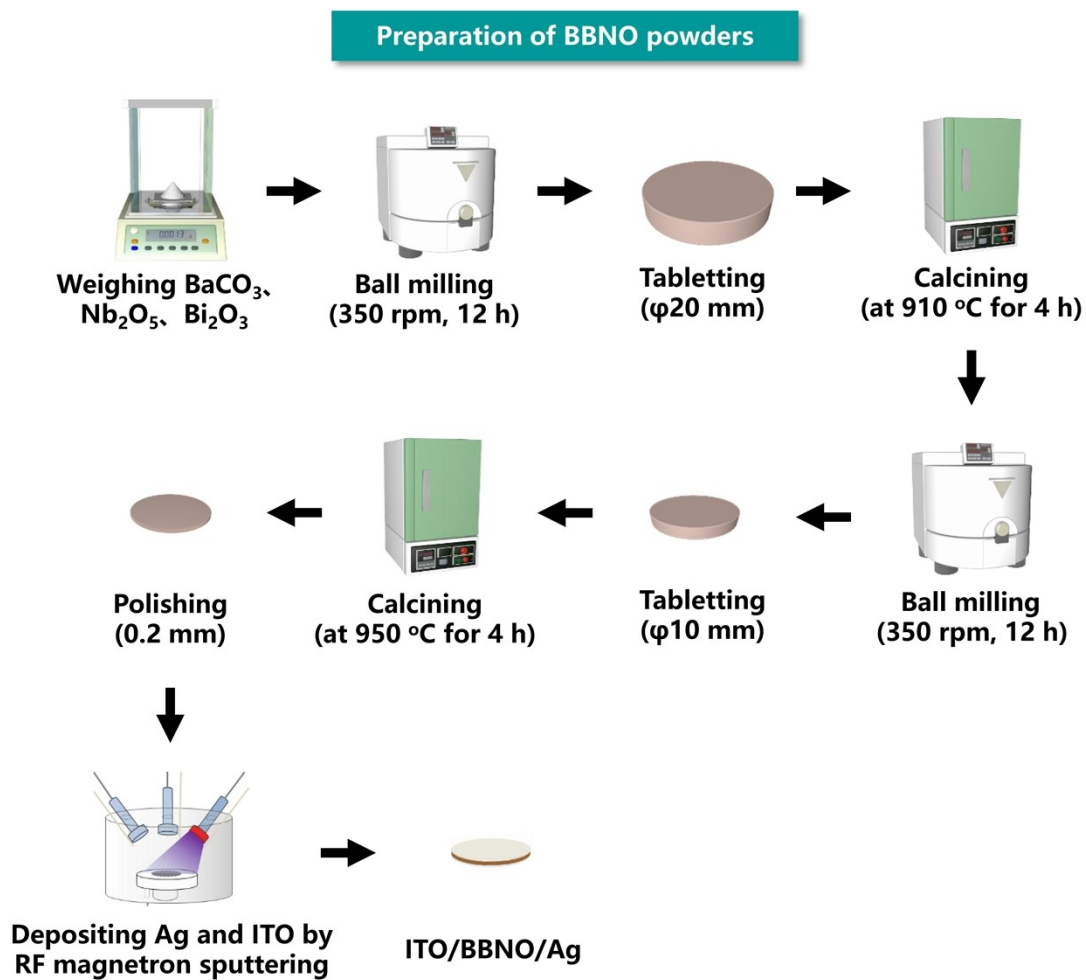

**Fig. S17** Schematic illustration for the fabrication process of ITO/BBNO/Ag photodetectors.

**Table S1. Comparison of the Photodetection Parameters for ITO/BBNO/Ag Photodetector and Other Types of Self-powered Photodetectors.**

| Photodetector                                                             | Wavelength<br>(nm) | Intensity<br>(mW/cm <sup>2</sup> ) | Responsivity<br>(A/W) | Specific detectivity<br>(Jones) |
|---------------------------------------------------------------------------|--------------------|------------------------------------|-----------------------|---------------------------------|
| <sup>1</sup> ITO/BaTiO <sub>3</sub> /Ag                                   | 405                | 111.1                              | $3.25 \times 10^{-7}$ | $2.97 \times 10^5$              |
| <sup>2</sup> Pt/TmFeO <sub>3</sub> /Pt                                    | 405                | 2.56                               | $1.1 \times 10^{-5}$  | /                               |
| <sup>3</sup> ITO/Bi <sub>0.5</sub> Na <sub>0.5</sub> TiO <sub>3</sub> /Ag | 405                | 155.05                             | $4.06 \times 10^{-6}$ | $1.27 \times 10^7$              |
| <sup>4</sup> ITO/PLZTN9/Ag                                                | AM 1.5G            | 100                                | $3.67 \times 10^{-7}$ | $9.08 \times 10^7$              |
|                                                                           | NIR                | 55.87                              | $2.78 \times 10^{-7}$ | $6.86 \times 10^7$              |
| <sup>5</sup> Au/BZT-BCT0.985/Au                                           | 405                | 100                                | $8.48 \times 10^{-7}$ | $2.37 \times 10^6$              |
|                                                                           | 520                | 100                                | $3.25 \times 10^{-7}$ | $9.09 \times 10^5$              |
|                                                                           | 655                | 100                                | $1.79 \times 10^{-7}$ | $5.01 \times 10^5$              |
|                                                                           | Xeno lamp          | 100                                | $1.79 \times 10^{-7}$ | $5.00 \times 10^5$              |
| ITO/BBNO/Ag                                                               | 365                | 661                                | $7.88 \times 10^{-5}$ | $1.13 \times 10^8$              |
| (This work)                                                               | 405                | 742                                | $4.96 \times 10^{-5}$ | $7.11 \times 10^8$              |
|                                                                           | 760                | 105.6                              | $1.46 \times 10^{-6}$ | $2.1 \times 10^6$               |
|                                                                           | white              | 340.0                              | $3.91 \times 10^{-6}$ | $5.61 \times 10^6$              |

### References for Supporting Information

1. N. Ma, K. Zhang and Y. Yang, *Adv. Mater.*, 2017, **29**, 1703694.
2. L. Jin, Y. He, D. Zhang, H. Zhang, M. Wei and Z. Zhong, *APL Mater.*, 2019, **7**, 121105.
3. Y. Liu, Y. Ji, Y. Xia, L. Wu, C. R. Bowen and Y. Yang, *Nano Energy*, 2022, **98**, 107312.
4. G. Huangfu, H. Xiao, L. Guan, H. Zhong, C. Hu, Z. Shi and Y. Guo, *ACS Appl. Mater. Interfaces*, 2020, **12**, 33950-33959.
5. L. Wang, C. Chen, X. He, K. Yao and Z. Yi, *J. Am. Ceram. Soc.*, 2022, 1-10.
